# Supplementary material for: Investigating the intracellular effects of hyperbranched polycation–DNA complexes on lung cancer cells using LC-MS-based metabolite profiling
Source: Royal Society of Chemistry journal article supplement (doi:10.1039/c8mo00139a), 2019-02-01
Supplement: c8mo00139a1.pdf [file c8mo00139a1.pdf]

## Electronic Supplementary Information

### Investigating the intracellular effects of hyperbranched polycation-DNA complexes on lung cancer cells using LC-MS-based metabolite profiling

Ali Alazzo,<sup>†a,b</sup> Mohammad Al-natour,<sup>†a,c</sup> Keith Spriggs,<sup>a</sup> Snjezana Stolnik,<sup>a</sup> Amir Ghaemmaghami,<sup>d</sup> Dong-Hyun Kim<sup>a</sup> and Cameron Alexander.\*<sup>a</sup>

<sup>a</sup> School of Pharmacy, University of Nottingham, NG7 2RD, UK. E-mail: cameron.alexander@nottingham.ac.uk. Tel: +44 (0)115 846 7678.

<sup>b</sup> Department of Pharmaceutics, University of Mosul, Mosul, Iraq.

<sup>c</sup> The Faculty of Pharmacy and Medical Sciences, University of Petra, Amman, Jordan

<sup>d</sup> Division of Immunology, School of Life Sciences, Faculty of Medicine and Health Sciences, Queen's Medical Centre, University of Nottingham, Nottingham, United Kingdom

<sup>†</sup> Both authors have equally contributed in this work.

Electronic Supplementary Information (ESI) available: [details of any supplementary information available should be included here].  
See DOI: 10.1039/x0xx00000x

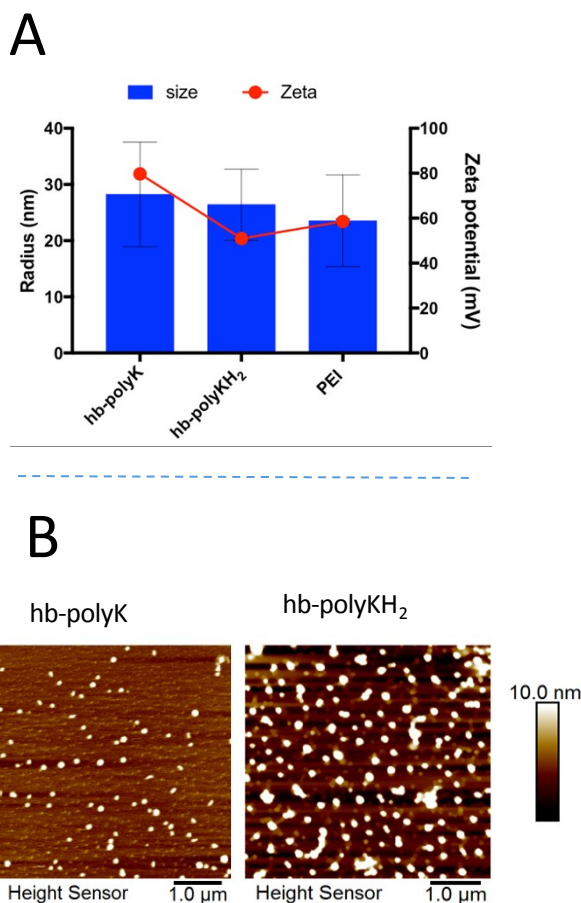

Figure S1 the physicochemical characterization of the polyplexes prepared in HEPES buffer (0.1 mM, pH 7.4) at N/P of 10, the size and zeta potential measurements (A) and the AFM images (B).

## A549 cells

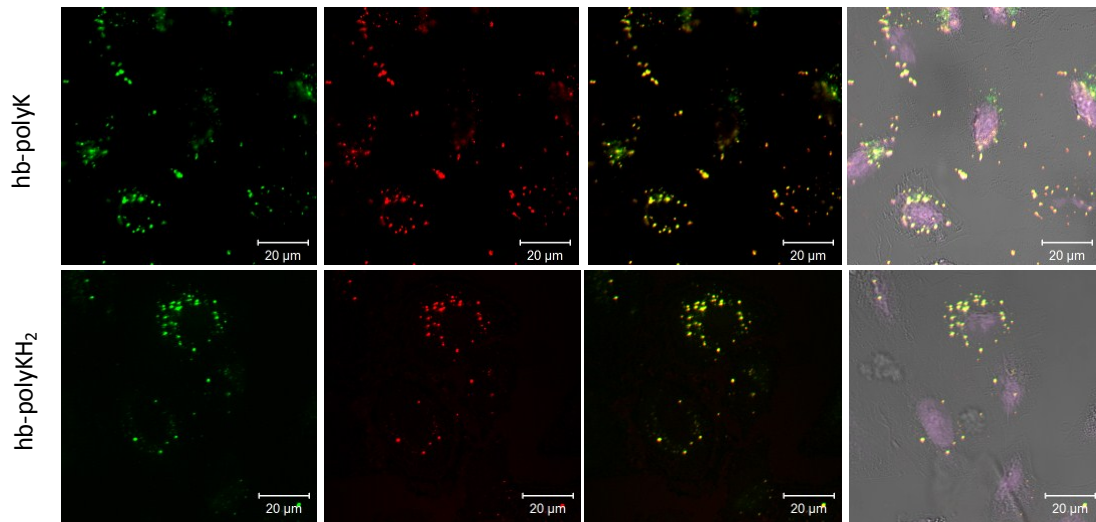

## H1299 cells

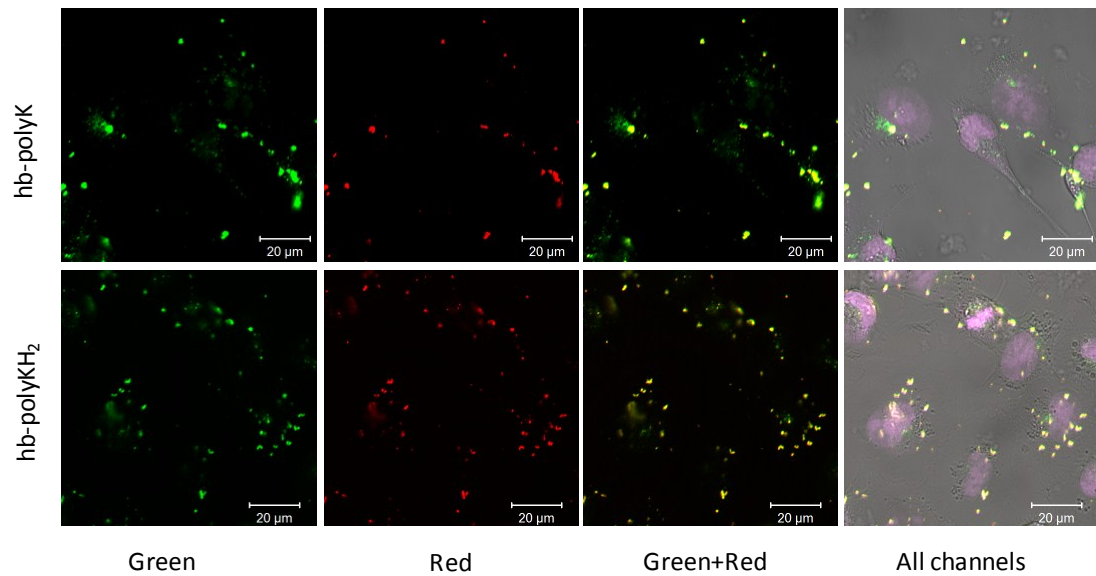

Figure S2 Confocal images show the uptake of hb-polyK and histidine containing hb-polyKH<sub>2</sub> complexes in A549 and H1299 cells. Areas in green are FITC-labelled polymers, area in red are Cy3-labelled plasmid, regions in yellow are assigned to overlaid Cy3-labelled plasmid and FITC-labelled polymers, and areas in purple correspond to DRAQ5 stained nuclei

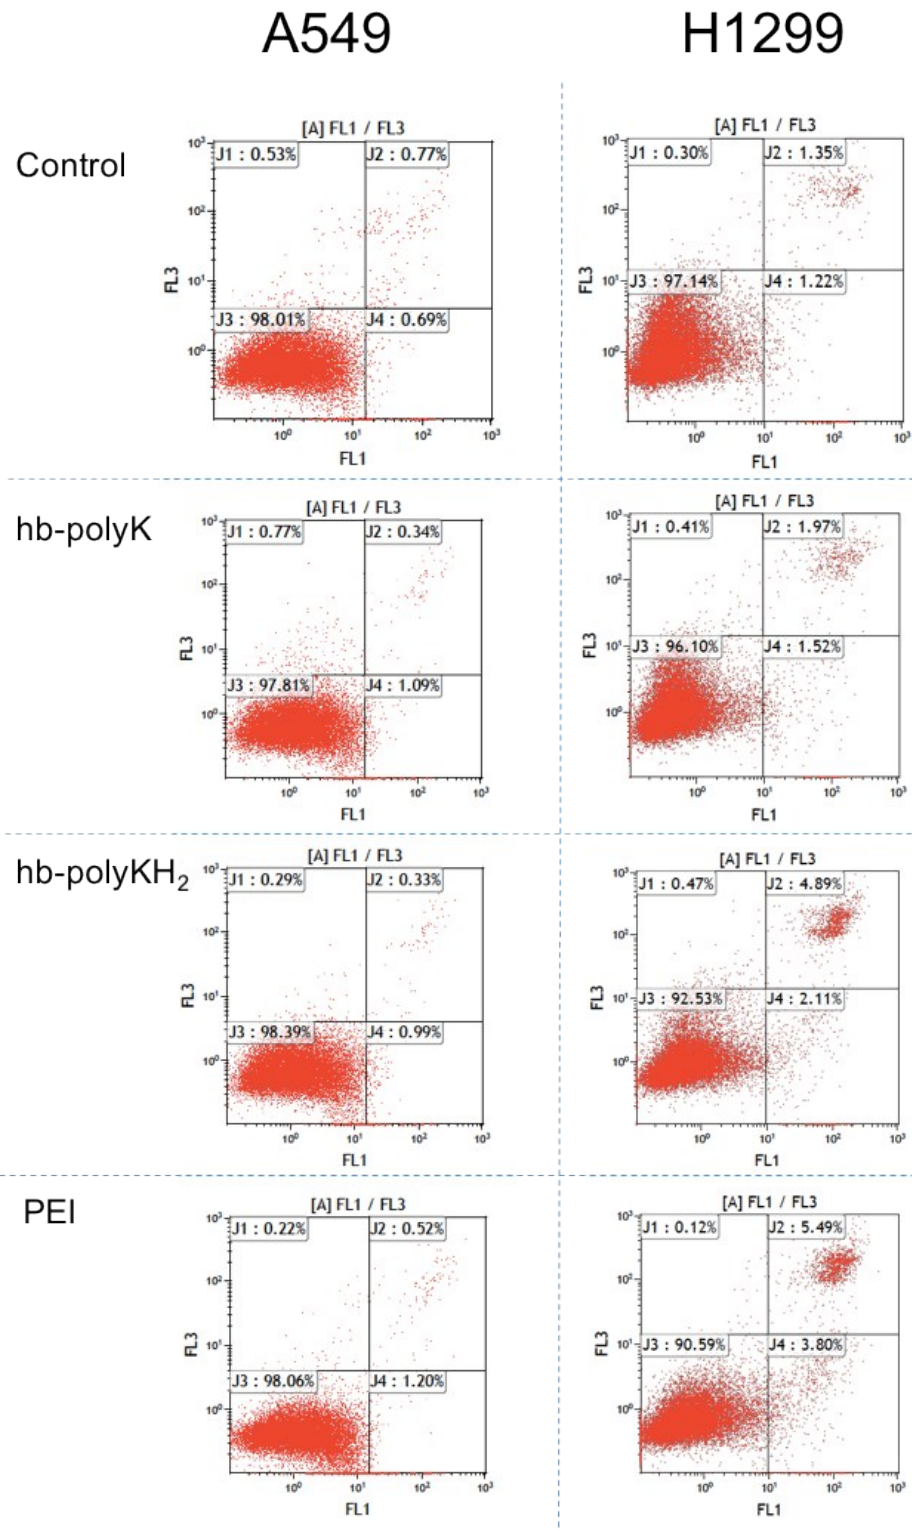

Figure S3 Flow cytometry analysis of Annexin-V/PI apoptosis assays to measure the apoptotic and dead cells in A549 and H1299 cells after four hour treatment with polyplexes of hb-polyK, hb-polyKH<sub>2</sub> and PEI (the control group with FBS-free medium), and then 20 hour of incubation without fully supplemented medium. The percentages of live, apoptotic, and dead cells were calculated from FL1/FL3. Annexin-V-FITC was used to detect apoptotic cells, and propidium iodide (PI) was used to detect dead cells. J1~ necrotic cells, J2 ~ dead cells, J3 ~ live cells, and J4 ~ apoptotic cell.

**A**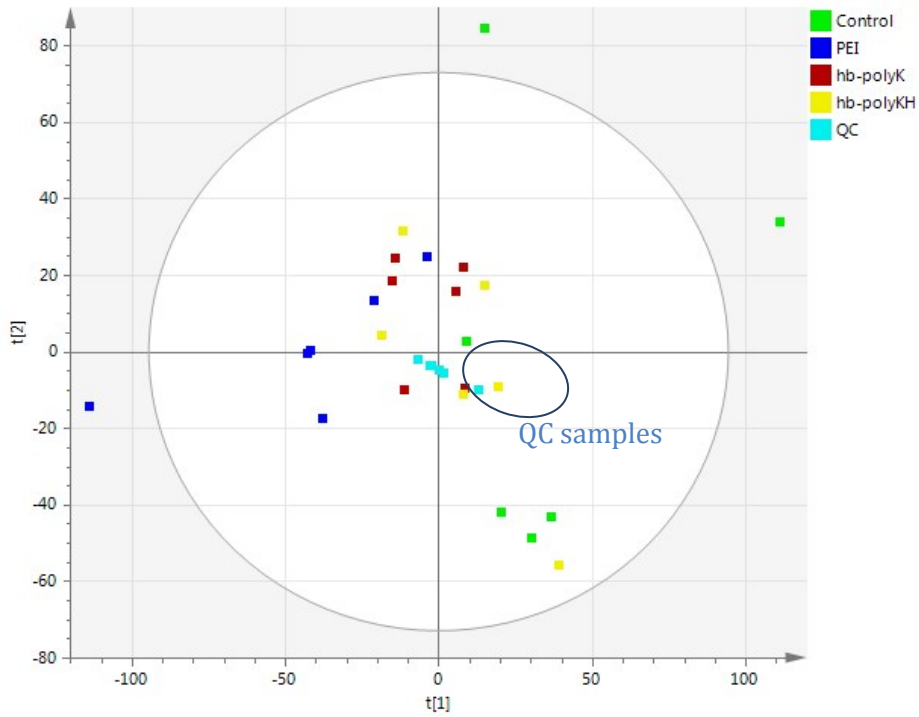**B**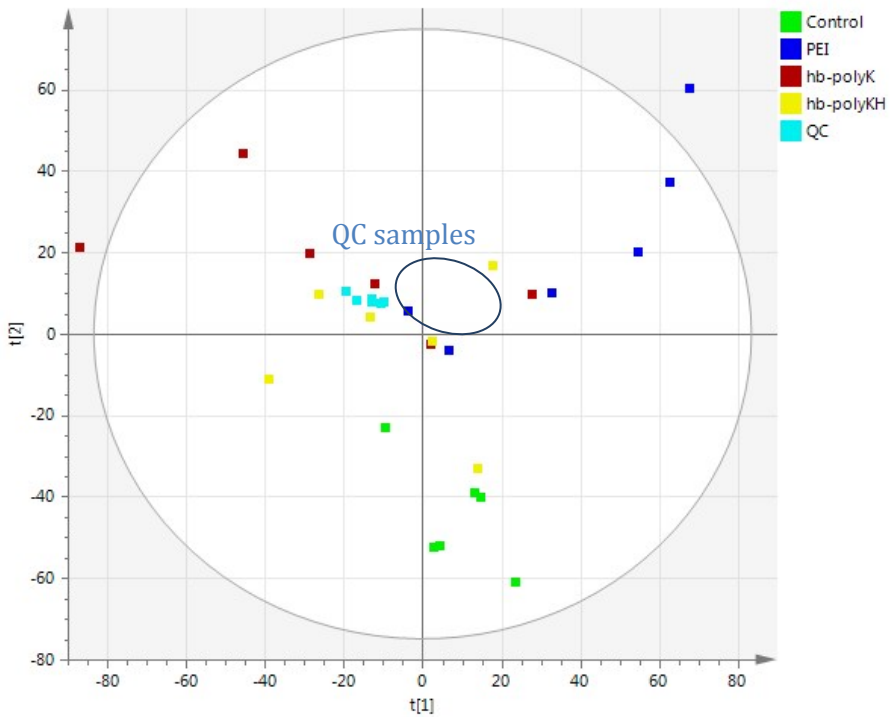

Figure S4: PCA scores plots of A) A549 cells samples ( $R^2X=0.563$ ,  $Q^2=0.147$ ) and B) H1299 cells samples ( $R^2X=0.622$ ,  $Q^2=0.333$ ) after four hour treatment with polyplexes of hb-polyK, hb-polyKH2 and PEI (the control group with FBS-free medium), and then 20 hour of incubation without fully supplemented medium. Both of the PCA plots couldn't separate between the different treatment groups, however the clustering of the repeatedly injected pooled QC samples indicating that the LC-MS system was stable throughout the run, this is confirmed by the fact that more than 70% of the detected features from the QC samples had CV of less than 30%.

Table S1: The metabolites that were changed significantly in A549 cells after the treatment with polyplexes, IDC: metabolite identification level according to the metabolomics standards initiative L1 – Level 1, L2 – Level 2.

| Mass     | Polarity | Mass error (PPM) | RT    | FORMULA  | Putative metabolite                 | IDC | Pathway                              | Control | Poly PEI | Poly K | Poly KH |
|----------|----------|------------------|-------|----------|-------------------------------------|-----|--------------------------------------|---------|----------|--------|---------|
| 89.0477  | +        | 0.247308         | 11.01 | C3H7NO2  | L-Alanine                           | L1  | Amino Acid Metabolism                | 1.00    | 0.70     | 1.00   | 1.00    |
| 90.0317  | -        | 0.417857         | 7.42  | C3H6O3   | Lactate                             | L1  | Carbohydrate Metabolism              | 1.00    | 0.52     | 0.78   | 0.90    |
| 100.0525 | +        | 0.399236         | 11.04 | C5H8O2   | Tiglic acid                         | L2  | Lipids: Fatty Acyls                  | 1.00    | 0.38     | 0.60   | 0.83    |
| 101.0841 | +        | 0.625395         | 16.84 | C5H11NO  | Betaine aldehyde                    | L2  | Amino Acid Metabolism                | 1.00    | 0.58     | 0.73   | 0.85    |
| 103.0633 | +        | -0.17921         | 11.02 | C4H9NO2  | 4-Amino-butanoate                   | L2  | Amino Acid Metabolism                | 1.00    | 0.49     | 0.61   | 0.86    |
| 103.0997 | +        | -0.18211         | 10.23 | C5H13NO  | Choline                             | L2  | Amino Acid Metabolism                | 1.00    | 0.74     | 0.83   | 0.76    |
| 104.0474 | -        | 0.090649         | 7.42  | C4H8O3   | 3-Hydroxy-butanoate                 | L2  | Lipid Metabolism                     | 1.00    | 0.75     | 1.17   | 1.02    |
| 111.9926 | -        | 0.523104         | 9.68  | CH5O4P   | Hydroxymethylphosphonate            | L2  | Amino Acid Metabolism                | 1.00    | 0.58     | 0.57   | 0.84    |
| 113.0477 | -        | 0.319435         | 10.03 | C5H7NO2  | 1-Pyrroline-5-carboxylate           | L2  | Amino Acid Metabolism                | 1.00    | 0.55     | 0.89   | 0.53    |
| 113.0589 | +        | 0.111963         | 8.47  | C4H7N3O  | Creatinine                          | L1  | Amino Acid Metabolism                | 1.00    | 0.61     | 0.97   | 0.86    |
| 117.0426 | -        | 0.260081         | 7.44  | C4H7NO3  | 2-Amino-3-oxobutanoic acid          | L2  | Amino Acid Metabolism                | 1.00    | 0.51     | 0.89   | 1.06    |
| 117.0789 | +        | -0.42807         | 9.67  | C5H11NO2 | Valine                              | L1  | Amino Acid Metabolism                | 1.00    | 0.62     | 0.89   | 0.88    |
| 122.0479 | +        | -0.63014         | 9.7   | C6H6N2O  | Isonicotineamide                    | L2  | -                                    | 1.00    | 0.49     | 0.51   | 0.94    |
| 123.9927 | +        | 1.019145         | 10.08 | C2H5O4P  | Phosphonoacetaldehyde               | L2  | Amino Acid Metabolism                | 1.00    | 0.71     | 0.86   | 0.86    |
| 125.0147 | +        | 0.021564         | 10.7  | C2H7NO3S | Taurine                             | L1  | Lipid Metabolism                     | 1.00    | 0.62     | 0.87   | 0.88    |
| 126.0084 | -        | 1.323157         | 9.7   | C2H7O4P  | Ethylphosphate                      | L2  | -                                    | 1.00    | 0.42     | 0.69   | 0.76    |
| 126.0429 | -        | -0.37997         | 7.49  | C5H6N2O2 | Thymine                             | L1  | Nucleotide Metabolism                | 1.00    | 6.09     | 7.59   | 1.88    |
| 126.043  | +        | 0.318535         | 8.67  | C5H6N2O2 | Imidazole-4-acetate                 | L1  | Amino Acid Metabolism                | 1.00    | 0.41     | 0.76   | 1.10    |
| 128.0586 | +        | 0.513835         | 10.85 | C5H8N2O2 | 5,6-Dihydrothymine                  | L2  | Nucleotide Metabolism                | 1.00    | 0.59     | 0.88   | 0.93    |
| 129.0427 | -        | 0.67742          | 5.48  | C5H7NO3  | 1-Pyrroline-4-hydroxy-2-carboxylate | L2  | Amino Acid Metabolism                | 1.00    | 0.44     | 0.56   | 0.49    |
| 130.063  | -        | 0.108729         | 9.68  | C6H10O3  | 4-Methyl-2-oxopentanoate            | L2  | Amino Acid Metabolism                | 1.00    | 0.52     | 0.82   | 0.80    |
| 130.1106 | +        | 0.1079           | 16.69 | C6H14N2O | N-Acetylputrescine                  | L2  | Amino Acid Metabolism                | 1.00    | 0.43     | 0.60   | 0.81    |
| 131.0582 | -        | -0.09926         | 5.3   | C5H9NO3  | 4-Amino-5-oxopentanoate             | L2  | Metabolism of Cofactors and Vitamins | 1.00    | 0.49     | 0.71   | 0.86    |
| 131.0583 | +        | 0.81444          | 10.58 | C5H9NO3  | Glutamate 5-semialdehyde            | L2  | Amino Acid Metabolism                | 1.00    | 0.65     | 0.80   | 0.90    |
| 131.0695 | +        | 0.181322         | 10.77 | C4H9N3O2 | Creatine                            | L1  | Amino Acid Metabolism                | 1.00    | 0.59     | 0.85   | 1.03    |
| 131.0946 | +        | 0.113021         | 9.05  | C6H13NO2 | Leucine                             | L2  | Amino Acid Metabolism                | 1.00    | 0.60     | 0.84   | 0.85    |
| 134.0216 | +        | -0.1023          | 10.44 | C4H6O5   | Malate                              | L1  | Carbohydrate Metabolism              | 1.00    | 0.69     | 0.92   | 1.00    |
| 135.0545 | +        | -0.32059         | 8.53  | C5H5N5   | Adenine                             | L1  | Nucleotide Metabolism                | 1.00    | 0.74     | 0.56   | 0.78    |
| 136.0524 | -        | 0.096993         | 5.15  | C8H8O2   | Phenylacetic acid                   | L2  | Amino Acid Metabolism                | 1.00    | 0.68     | 0.78   | 0.82    |
| 137.0476 | -        | -0.38995         | 7.35  | C7H7NO2  | Anthranilate                        | L2  | Amino Acid Metabolism                | 1.00    | 6.11     | 6.55   | 1.54    |
| 140.0585 | +        | -0.21461         | 7.43  | C6H8N2O2 | Methylimidazoleacetic acid          | L2  | Amino Acid Metabolism                | 1.00    | 0.57     | 0.92   | 0.90    |
| 141.0193 | +        | 1.080585         | 10.68 | C2H8NO4P | Ethanolamine phosphate              | L1  | Amino Acid Metabolism                | 1.00    | 1.47     | 1.59   | 1.22    |

|          |   |          |       |            |                                       |    |                                       |      |      |      |      |
|----------|---|----------|-------|------------|---------------------------------------|----|---------------------------------------|------|------|------|------|
| 145.0375 | - | -0.3444  | 7.42  | C5H7NO4    | 4-Oxoglutaramate                      | L2 | Amino Acid Metabolism                 | 1.00 | 0.53 | 0.68 | 1.05 |
| 145.0851 | + | -0.23836 | 11.07 | C5H11N3O2  | 4-Guanidinobutanoate                  | L2 | Amino Acid Metabolism                 | 1.00 | 0.58 | 0.88 | 0.92 |
| 145.1102 | + | -0.31882 | 9.85  | C7H15NO2   | 4-Trimethylammonibutanoate            | L1 | Amino Acid Metabolism                 | 1.00 | 0.64 | 0.96 | 1.08 |
| 146.0215 | - | -0.36396 | 10.29 | C5H6O5     | 2-Oxoglutarate                        | L1 | Carbohydrate Metabolism               | 1.00 | 0.42 | 0.68 | 0.88 |
| 146.0691 | + | -0.5994  | 10.71 | C5H10N2O3  | Glutamine                             | L1 | Amino Acid Metabolism                 | 1.00 | 1.26 | 1.12 | 0.93 |
| 147.0532 | - | -0.00964 | 7.44  | C5H9NO4    | O-Acetyl-L-serine                     | L2 | Amino Acid Metabolism                 | 1.00 | 0.47 | 0.84 | 1.16 |
| 148.0371 | - | -0.22135 | 10.05 | C5H8O5     | Xylonolactone                         | L2 | Carbohydrate Metabolism               | 1.00 | 0.64 | 0.77 | 0.97 |
| 150.0527 | - | -0.65371 | 8.56  | C5H10O5    | Ribose                                | L2 | Carbohydrate Metabolism               | 1.00 | 2.28 | 3.96 | 1.53 |
| 152.0684 | - | -0.30823 | 9.87  | C5H12O5    | Xylitol                               | L2 | Carbohydrate Metabolism               | 1.00 | 0.49 | 0.87 | 1.14 |
| 156.0535 | + | -0.10662 | 8.26  | C6H8N2O3   | 4-Imidazolone-5-propanoate            | L2 | Amino Acid Metabolism                 | 1.00 | 0.43 | 0.65 | 0.98 |
| 158.0439 | - | -0.48709 | 10.65 | C4H6N4O3   | Allantoin                             | L2 | Nucleotide Metabolism                 | 1.00 | 0.59 | 0.92 | 0.70 |
| 159.0531 | - | -0.39978 | 5.3   | C6H9NO4    | N-Methyl-2-oxoglutaramate             | L2 | -                                     | 1.00 | 0.47 | 0.59 | 0.68 |
| 159.0896 | + | 0.369441 | 9.57  | C7H13NO3   | 5-Acetamidopentanoate                 | L2 | Amino Acid Metabolism                 | 1.00 | 0.59 | 0.88 | 1.03 |
| 160.1211 | + | -0.33452 | 16.28 | C7H16N2O2  | N6-Methyl-L-lysine                    | L2 | Amino Acid Metabolism                 | 1.00 | 0.59 | 0.77 | 0.78 |
| 161.0688 | + | -0.20004 | 8.87  | C6H11NO4   | O-Acetyl-L-homoserine                 | L2 | Amino Acid Metabolism                 | 1.00 | 0.37 | 0.80 | 0.85 |
| 161.0688 | - | -0.07702 | 7.41  | C6H11NO4   | O-Acetyl-L-homoserine                 | L2 | Amino Acid Metabolism                 | 1.00 | 0.41 | 0.73 | 0.90 |
| 161.1052 | + | -0.24637 | 9.84  | C7H15NO3   | Carnitine                             | L1 | Amino Acid Metabolism                 | 1.00 | 0.63 | 0.94 | 1.01 |
| 163.0666 | + | -0.40217 | 5.88  | C6H13NO2S  | homomethionine                        | L2 | Amino Acid Metabolism                 | 1.00 | 0.52 | 0.60 | 0.81 |
| 165.0426 | - | 0.257381 | 4.89  | C8H7NO3    | Formylanthranilate                    | L2 | Amino Acid Metabolism                 | 1.00 | 54.7 | 33.7 | 1.18 |
| 165.079  | + | 0.148487 | 8.49  | C9H11NO2   | Phenylalanine                         | L2 | Amino Acid Metabolism                 | 1.00 | 0.61 | 0.84 | 0.92 |
| 166.0477 | - | -0.18446 | 9.59  | C5H10O6    | Arabinonate                           | L2 | Carbohydrate Metabolism               | 1.00 | 0.46 | 1.05 | 0.84 |
| 167.0712 | - | 0.537182 | 9.17  | C5H14NO3P  | N-Trimethyl-2-aminoethylphosphonate   | L2 | Amino Acid Metabolism                 | 1.00 | 0.59 | 0.84 | 0.82 |
| 169.0044 | - | -0.34971 | 10.69 | C3H7NO5S   | Cysteate                              | L1 | Amino Acid Metabolism                 | 1.00 | 0.64 | 0.87 | 0.95 |
| 169.0504 | + | -0.15033 | 9.61  | C4H12NO4P  | Phosphodimethylethanolamine           | L2 | Amino Acid Metabolism                 | 1.00 | 0.43 | 0.83 | 0.88 |
| 172.0137 | - | -0.1157  | 9.97  | C3H9O6P    | Glycerol 3-phosphate                  | L1 | Lipid Metabolism                      | 1.00 | 0.56 | 0.92 | 0.79 |
| 173.0688 | + | -0.03571 | 5.3   | C7H11NO4   | N-Acetyl-L-glutamate 5-semialdehyde   | L2 | Amino Acid Metabolism                 | 1.00 | 0.57 | 0.74 | 1.02 |
| 174.0164 | - | -0.28792 | 11.2  | C6H6O6     | cis-Aconitate                         | L2 | Carbohydrate Metabolism               | 1.00 | 0.63 | 0.70 | 1.08 |
| 174.1368 | + | 0.056377 | 15.07 | C8H18N2O2  | Ne,Ne dimethyllysine                  | L2 | -                                     | 1.00 | 0.48 | 0.78 | 0.69 |
| 175.048  | - | -0.17279 | 9.72  | C6H9NO5    | N-Acetylaspartate                     | L2 | Amino Acid Metabolism                 | 1.00 | 0.66 | 0.94 | 0.88 |
| 176.0432 | - | -0.44438 | 10.8  | C5H8N2O5   | N-Carbamoyaspartate                   | L2 | Nucleotide Metabolism                 | 1.00 | 0.44 | 0.81 | 0.96 |
| 183.0661 | + | 0.490828 | 10.09 | C5H14NO4P  | Choline phosphate                     | L1 | Lipid Metabolism                      | 1.00 | 0.77 | 0.93 | 0.97 |
| 185.9928 | - | -0.51588 | 11.02 | C3H7O7P    | 3-Phospho-D-glycerate                 | L2 | Carbohydrate Metabolism               | 1.00 | 0.39 | 0.59 | 1.05 |
| 189.0637 | + | -0.11107 | 9.47  | C7H11NO5   | N-Acetylglutamate                     | L1 | Amino Acid Metabolism                 | 1.00 | 0.31 | 0.65 | 0.58 |
| 190.059  | - | 0.240851 | 10.58 | C6H10N2O5  | N-Carbamylglutamate                   | L2 | Amino Acid Metabolism                 | 1.00 | 0.39 | 0.49 | 0.92 |
| 202.143  | + | 0.172679 | 15.51 | C8H18N4O2  | NG,NG-Dimethylarginine                | L2 | -                                     | 1.00 | 0.52 | 0.74 | 0.81 |
| 204.0899 | + | 0.10895  | 9.56  | C11H12N2O2 | Tryptophan                            | L1 | Amino Acid Metabolism                 | 1.00 | 0.50 | 0.73 | 0.83 |
| 204.1474 | + | 0.13242  | 13.9  | C9H20N2O3  | 3-Hydroxy-N6,N6,N6-trimethyl-L-lysine | L2 | Amino Acid Metabolism                 | 1.00 | 0.50 | 0.63 | 1.00 |
| 208.0848 | + | -0.01681 | 9.05  | C10H12N2O3 | Kynurenine                            | L1 | Amino Acid Metabolism                 | 1.00 | 8.25 | 7.76 | 0.74 |
| 210.0527 | - | -0.39274 | 5.21  | C10H10O5   | 5-Hydroxyferulate                     | L2 | Biosynthesis of Secondary Metabolites | 1.00 | 0.69 | 0.91 | 0.69 |
| 211.0358 | + | 0.131998 | 9.98  | C4H10N3O5P | Phosphocreatine                       | L2 | Amino Acid Metabolism                 | 1.00 | 0.30 | 0.69 | 0.90 |
| 218.1266 | + | -0.14451 | 10.42 | C9H18N2O4  | N2-(D-1-Carboxyethyl)-L-lysine        | L2 | Amino Acid Metabolism                 | 1.00 | 0.45 | 0.63 | 0.97 |
| 219.0742 | - | -0.61579 | 9.4   | C8H13NO6   | O-Succinyhomoserine                   | L2 | Amino Acid Metabolism                 | 1.00 | 0.27 | 0.54 | 0.59 |

| Mass     | Polarity | Mass error (PPM) | RT    | FORMULA      | Putative metabolite                      | IDC  | Pathway                               | Control | Poly PEI | Poly K | Poly KH |
|----------|----------|------------------|-------|--------------|------------------------------------------|------|---------------------------------------|---------|----------|--------|---------|
| 88.016   | -        | -0.00068         | 5.69  | C3H4O3       | 3-Oxopropanoate                          | L2   | Carbohydrate Metabolism               | 1.00    | 0.49     | 0.86   | 0.78    |
| 89.0477  | -        | -0.01326         | 10.06 | C3H7NO2      | beta-Alanine                             | L2   | Nucleotide Metabolism                 | 1.00    | 0.67     | 0.63   | 0.74    |
| 89.0477  | +        | 0.20821          | 11.15 | C3H7NO2      | Alanine                                  | L1   | Amino Acid Metabolism                 | 1.00    | 0.61     | 0.55   | 0.70    |
| 103.0997 | +        | -0.06347         | 17.54 | C5H13NO      | Choline                                  | L2   | Amino Acid Metabolism                 | 1.00    | 2.88     | 1.77   | 1.81    |
| 105.0426 | +        | 0.396434         | 11.52 | C3H7NO3      | Serine                                   | L1   | Amino Acid Metabolism                 | 1.00    | 2.25     | 1.44   | 1.43    |
| 109.0198 | +        | 0.074003         | 11.25 | C2H7NO2S     | Hypotaurine                              | L2   | Amino Acid Metabolism                 | 1.00    | 0.48     | 0.55   | 0.72    |
| 113.0477 | -        | 0.283662         | 10.37 | C5H7NO2      | 1-Pyrroline-5-carboxylate                | L2   | Amino Acid Metabolism                 | 1.00    | 3.00     | 1.16   | 1.79    |
| 220.0848 | +        | 0.154061         | 7.52  | C11H12N2O3   | 3-Hydroxytryptophan acetate              | L2   | Amino Acid Metabolism                 | 1.00    | 1.62     | 1.00   | 1.02    |
| 222.0674 | +        | -0.246691        | 11.33 | C7H14N2O4S   | Cystathionine                            | L1   | Amino Acid Metabolism                 | 1.00    | 1.23     | 0.85   | 0.97    |
| 227.0906 | -        | 0.068623         | 7.56  | C5H10N3O4    | 5-Deoxycytidine                          | L2   | Nucleotide Metabolism                 | 1.00    | 0.79     | 0.68   | 0.77    |
| 231.147  | +        | -0.335905        | 7.77  | C17H21NO4    | 4-Butanoylcarnitine                      | L2   | Lipids: Fatty Acyls                   | 1.00    | 1.67     | 1.00   | 1.13    |
| 236.0797 | +        | -0.128103        | 8.38  | C10H12N2O4   | 2-Hydroxy-3-methylputrescine             | L2   | Amino Acid Metabolism                 | 1.00    | 0.39     | 0.49   | 0.63    |
| 240.1473 | +        | -0.259491        | 8.67  | C6H14N2O3    | N-Acetylputrescine                       | L2   | Biosynthesis of Secondary Metabolites | 1.00    | 0.53     | 0.72   | 0.75    |
| 246.0504 | +        | -0.353483        | 9.07  | C6H15O8P     | 3-Glycerophosphoethanoloxopentanoic acid | - L2 | Amino Acid Metabolism                 | 1.00    | 0.65     | 0.56   | 0.66    |
| 246.1329 | +        | 0.169950         | 10.44 | C5H9NO2      | (D-1-Carboxyethyl)serine                 | L2   | Amino Acid Metabolism                 | 1.00    | 0.63     | 0.42   | 0.63    |
| 247.142  | +        | 0.122203         | 8.86  | C4H9NO2      | 2-Oxybutyrate                            | L2   | - L1 Amino Acid Metabolism            | 1.00    | 0.44     | 0.46   | 0.60    |
| 257.1028 | +        | 0.024194         | 10.26 | C6H13NO2     | 2-Pro-3-Phosphocholine                   | L1   | Lipid Metabolism                      | 1.00    | 1.95     | 1.17   | 1.24    |
| 260.0296 | -        | -0.465010        | 10.46 | C4H8N2O3     | D-Glucose 6-phosphate                    | L1   | Carbohydrate Metabolism               | 1.00    | 1.06     | 0.77   | 0.93    |
| 275.1733 | -        | 0.207340         | 8.25  | C17H25NO5    | (3S-hydroxydecanoyl)-L-serine            | L2   | Lipids: Fatty Acyls                   | 1.00    | 0.63     | 0.53   | 0.79    |
| 301.2979 | +        | -0.514624        | 7.43  | C14H19NO2    | Cystathionine 4-Guanidinobutanoate       | L2   | Lipids: Sphingolipid Metabolism       | 1.00    | 0.73     | 0.72   | 0.83    |
| 307.0838 | +        | -0.016201        | 9.82  | C12H17N3O6S  | 2-Methionine 4-Trimethylammoniobutanoate | L1   | Amino Acid Metabolism                 | 1.00    | 0.90     | 0.71   | 0.76    |
| 369.2877 | -        | -0.584592        | 5.2   | C25H39NO4    | C5-Hexadecenoic acid                     | L2   | - L1 Carbohydrate Metabolism          | 1.00    | 0.43     | 0.45   | 0.61    |
| 466.3117 | +        | 0.090603         | 4.04  | C29H46O4S    | C5-Hexadecenoic acid                     | L2   | Lipids: Steroid Lipid Metabolism      | 1.00    | 0.60     | 0.39   | 0.65    |
| 612.152  | -        | 0.050953         | 10.86 | C24H32N6O12S | 2-Methionine S-adenosylmethionine        | L1   | Amino Acid Metabolism                 | 1.00    | 1.77     | 1.26   | 1.34    |
| 663.1091 | +        | -0.004301        | 9.62  | C23H27N7O14P | Adenosine                                | L2   | Energy Metabolism                     | 0.00    | 11.63    | 0.00   | 0.00    |
| 703.515  | +        | -0.263074        | 4.64  | C8H11NO      | O-Acetyl-L-homoserine                    | L2   | Lipids: Glycerophospholipids          | 1.00    | 0.50     | 0.44   | 0.70    |
| 704.5844 | +        | 1.648575         | 4.74  | C12H18N2O6P  | Carnitine                                | L2   | Lipids: Sphingolipid Metabolism       | 1.00    | 0.68     | 0.66   | 0.73    |
| 719.5836 | +        | 0.013402         | 4.84  | C9H11NO      | Phenylalanine                            | L2   | Lipids: Glycerophospholipids          | 1.00    | 2.20     | 1.33   | 1.36    |
| 731.5462 | +        | -0.381507        | 4.63  | C9H17NO8P    | Phosphodimethylethanolamine              | L2   | Lipids: Glycerophospholipids          | 1.00    | 0.73     | 0.76   | 0.94    |
| 748.5254 | -        | 0.001225         | 4.03  | C10H17O10P   | Glycerol 3-phosphate                     | L2   | Lipids: Glycerophospholipids          | 1.00    | 1.57     | 1.55   | 1.22    |
| 774.5412 | -        | 0.145202         | 4.02  | C14H17O10P   | cis-Aconitate                            | L2   | Lipids: Glycerophospholipids          | 1.00    | 0.67     | 0.52   | 0.83    |
| 174.1004 | +        | 0.004804         | 10.28 | C7H14N2O3    | N5-Ethyl-L-glutamine                     | L2   | -                                     | 1.00    | 1.54     | 1.07   | 0.96    |
| 175.0481 | +        | 0.069856         | 10.04 | C6H9NO5      | N-Acetyl-L-aspartate                     | L2   | Amino Acid Metabolism                 | 1.00    | 0.66     | 0.64   | 0.78    |
| 175.0957 | +        | 0.019941         | 11.54 | C6H13N3O3    | Citrulline                               | L1   | Amino Acid Metabolism                 | 1.00    | 1.50     | 0.91   | 1.12    |
| 177.046  | +        | -0.06226         | 5.58  | C6H11NO3S    | N-Formylmethionine                       | L2   | Amino Acid Metabolism                 | 1.00    | 0.88     | 0.65   | 0.70    |
| 178.0412 | +        | -0.05819         | 10.09 | C5H10N2O3S   | Cys-Gly                                  | L2   | Amino Acid Metabolism                 | 1.00    | 0.57     | 0.62   | 0.83    |
| 179.0582 | -        | -0.05216         | 7.42  | C9H9NO3      | N-Acetylanthranilate                     | L2   | -                                     | 1.00    | 0.69     | 0.59   | 0.72    |
| 181.0739 | -        | 0.112349         | 10.4  | C9H11NO3     | Tyrosine                                 | L1   | Amino Acid Metabolism                 | 1.00    | 1.72     | 0.94   | 1.32    |
| 182.0791 | -        | 0.333763         | 10.65 | C6H14O6      | Sorbitol                                 | L2   | Carbohydrate Metabolism               | 1.00    | 1.57     | 0.77   | 1.16    |
| 183.0661 | +        | 0.429736         | 10.42 | C5H14NO4P    | Choline phosphate                        | L1   | Lipid Metabolism                      | 1.00    | 0.64     | 0.85   | 0.87    |
| 188.1525 | +        | 0.2506           | 15.86 | C9H20N2O2    | N6,N6,N6-Trimethyl-L-lysine              | L2   | Amino Acid Metabolism                 | 1.00    | 1.80     | 0.97   | 1.23    |
| 189.0637 | +        | -0.05389         | 9.77  | C7H11NO5     | N-Acetyl-L-glutamate                     | L1   | Amino Acid Metabolism                 | 1.00    | 0.80     | 0.60   | 0.70    |
| 191.0616 | +        | 0.116175         | 5.32  | C7H13NO3S    | N-Acetylmethionine                       | L2   | -                                     | 1.00    | 0.72     | 0.44   | 0.65    |
| 195.0897 | +        | 0.709481         | 5.65  | C10H13NO3    | Tyrosine methyl ester                    | L2   | Amino Acid Metabolism                 | 1.00    | 0.75     | 0.66   | 0.86    |
| 203.1158 | +        | 0.26164          | 9.08  | C9H17NO4     | O-Acetylcarnitine                        | L1   | Amino Acid Metabolism                 | 1.00    | 0.63     | 0.48   | 0.64    |
| 204.0899 | +        | 0.051584         | 9.88  | C11H12N2O2   | Tryptophan                               | L1   | Amino Acid Metabolism                 | 1.00    | 2.03     | 1.25   | 1.27    |
| 231.147  | +        | -0.114           | 8.05  | C11H21NO4    | O-Butanoylcarnitine                      | L2   | Lipids: Fatty Acyls                   | 1.00    | 0.56     | 0.58   | 0.70    |
| 243.0854 | +        | -0.34119         | 9.91  | C9H13N3O5    | Glutamyl-beta-cyanoalanine               | L2   | Amino Acid Metabolism                 | 1.00    | 3.28     | 0.82   | 1.08    |
| 244.0882 | +        | -0.01307         | 5.65  | C10H16N2O3S  | Biotin                                   | L2   | Metabolism of Cofactors and           | 1.00    | 1.52     | 0.75   | 0.98    |

|          |   |          |       |             |                                  |    |                              |      |      |      |      |
|----------|---|----------|-------|-------------|----------------------------------|----|------------------------------|------|------|------|------|
| 244.1059 | + | 0.062446 | 10.1  | C10H16N2O5  | Glu-Pro                          | L2 | Vitamins                     |      |      |      |      |
| 245.1626 | + | -0.26101 | 7.71  | C12H23NO4   | N-(octanoyl)-L-homoserine        | L2 | Peptide(di-)                 | 1.00 | 0.56 | 0.42 | 0.81 |
| 245.1626 | + | -0.25621 | 6.35  | C12H23NO4   | 2-Methylbutyrylcarnitine         | L2 | -                            | 1.00 | 0.77 | 0.75 | 0.85 |
| 246.0504 | + | -0.17565 | 9.37  | C6H15O8P    | Glycerophosphoglycerol           | L2 | -                            | 1.00 | 0.69 | 0.63 | 0.70 |
| 246.1329 | + | 0.467084 | 10.81 | C9H18N4O4   | N2-(D-1-Carboxyethyl)-L-arginine | L2 | Amino Acid Metabolism        | 1.00 | 0.31 | 0.36 | 0.54 |
| 257.1029 | + | 0.15967  | 10.62 | C8H20NO6P   | sn-glycero-3-Phosphocholine      | L1 | Lipid Metabolism             | 1.00 | 0.87 | 0.54 | 0.71 |
| 267.0967 | + | -0.19584 | 8.45  | C10H13N5O4  | Adenosine                        | L1 | Nucleotide Metabolism        | 1.00 | 1.41 | 1.41 | 1.19 |
| 281.1124 | + | -0.13102 | 12.23 | C11H15N5O4  | 1-Methyladenosine                | L2 | -                            | 1.00 | 1.66 | 1.40 | 1.15 |
| 299.2824 | + | -0.13397 | 7.33  | C18H37NO2   | 3-dehydrosphinganine             | L2 | Lipids: Sphingolipids        | 1.00 | 1.93 | 0.88 | 0.96 |
| 301.298  | + | -0.2723  | 7.44  | C18H39NO2   | Sphinganine                      | L2 | Lipids: Sphingolipids        | 1.00 | 1.17 | 0.69 | 0.55 |
| 307.0838 | + | -0.15933 | 10.1  | C10H17N3O6S | Glutathione                      | L1 | Amino Acid Metabolism        | 1.00 | 1.24 | 0.64 | 0.67 |
| 347.063  | + | -0.20359 | 9.66  | C10H14N5O7P | AMP                              | L1 | Nucleotide Metabolism        | 1.00 | 0.55 | 0.64 | 0.81 |
| 371.3036 | + | 0.200741 | 5.44  | C21H41NO4   | Tetradecanoylcarnitine           | L2 | -                            | 1.00 | 0.79 | 0.58 | 0.82 |
| 397.3192 | + | -0.05176 | 5.34  | C23H43NO4   | Hexadec-2-enoylcarnitine         | L2 | -                            | 1.00 | 2.12 | 2.20 | 1.01 |
| 399.3349 | + | 0.08556  | 5.3   | C23H45NO4   | O-Palmitoyl-R-carnitine          | L2 | Lipids: Fatty Acyls          | 1.00 | 2.48 | 1.87 | 1.02 |
| 425.3505 | + | -0.00153 | 5.23  | C25H47NO4   | Elaidiccarnitine                 | L2 | -                            | 1.00 | 3.25 | 3.05 | 1.67 |
| 427.3662 | + | 0.097364 | 5.18  | C25H49NO4   | Stearoylcarnitine                | L2 | -                            | 1.00 | 3.99 | 3.41 | 1.62 |
| 466.3115 | - | -0.29258 | 4.09  | C27H46O4S   | Cholesterolsulfate               | L2 | Lipids: Sterol lipids        | 1.00 | 3.83 | 5.58 | 2.07 |
| 467.3012 | + | -0.05581 | 5.48  | C22H46NO7P  | PC (14:0)                        | L2 | Lipids: Glycerophospholipids | 1.00 | 0.87 | 0.61 | 0.64 |
| 481.3534 | + | 0.347655 | 5.38  | C24H52NO6P  | PC (16:2)                        | L2 | Lipids: Glycerophospholipids | 1.00 | 1.43 | 0.68 | 0.81 |
| 523.2909 | + | -0.18379 | 4.42  | C24H46NO9P  | PS (18:1)                        | L2 | Lipids: Glycerophospholipids | 1.00 | 0.76 | 0.67 | 0.68 |
| 525.3067 | + | -0.03636 | 4.4   | C24H48NO9P  | PS (18:0)                        | L2 | Lipids: Glycerophospholipids | 1.00 | 1.72 | 0.73 | 0.78 |
| 537.5121 | + | 0.029172 | 4.58  | C34H67NO3   | SP (16:0)                        | L2 | Lipids: Sphingolipids        | 1.00 | 1.71 | 0.71 | 0.73 |
| 598.3119 | - | 0.09071  | 4.44  | C27H51O12P  | PI (18:1)                        | L2 | Lipids: Glycerophospholipids | 1.00 | 1.17 | 0.81 | 0.74 |
| 600.3277 | - | 0.454354 | 4.42  | C27H53O12P  | PI (18:0)                        | L2 | Lipids: Glycerophospholipids | 1.00 | 1.57 | 0.69 | 0.79 |
| 674.4886 | - | -0.03932 | 4.11  | C37H71O8P   | PA(34:1)                         | L2 | Lipids: Glycerophospholipids | 1.00 | 1.34 | 0.80 | 0.78 |
| 689.4995 | + | -0.0279  | 4.58  | C37H72NO8P  | PE(32:1)                         | L2 | Lipids: Glycerophospholipids | 1.00 | 0.64 | 0.38 | 0.49 |
| 705.5306 | + | -0.33223 | 4.8   | C38H76NO8P  | PC(30:0)                         | L2 | Lipids: Glycerophospholipids | 1.00 | 0.73 | 0.58 | 0.63 |
| 717.5309 | + | 0.061038 | 4.57  | C39H76NO8P  | PE(34:1)                         | L2 | Lipids: Glycerophospholipids | 1.00 | 0.82 | 0.72 | 0.85 |
| 719.5833 | + | 0.539418 | 4.78  | C40H82NO7P  | PC (32:2)                        | L2 | Lipids: Glycerophospholipids | 1.00 | 0.74 | 0.61 | 0.66 |
| 731.5464 | + | -0.10583 | 4.78  | C40H78NO8P  | PC(32:1)                         | L2 | Lipids: Glycerophospholipids | 1.00 | 0.80 | 0.63 | 0.71 |
| 733.4892 | + | -0.20987 | 4.16  | C38H72NO10P | PS(32:1)                         | L2 | Lipids: Glycerophospholipids | 1.00 | 0.81 | 0.73 | 0.81 |
| 748.5256 | - | 0.220898 | 4.06  | C40H77O10P  | PG(34:1)                         | L2 | Lipids: Glycerophospholipids | 1.00 | 0.67 | 0.47 | 0.66 |
| 761.5206 | + | -0.06133 | 4.17  | C40H76NO10P | PS(34:1)                         | L2 | Lipids: Glycerophospholipids | 1.00 | 0.69 | 0.48 | 0.68 |
| 819.6153 | + | 1.358911 | 4.7   | C48H86NO7P  | PC(40:5)                         | L2 | Lipids: Glycerophospholipids | 1.00 | 0.76 | 0.50 | 0.58 |
| 820.5258 | - | 0.496579 | 4.02  | C46H77O10P  | PG(40:7)                         | L2 | Lipids: Glycerophospholipids | 1.00 | 1.46 | 1.03 | 1.05 |
| 879.5841 | + | 0.4514   | 4.17  | C45H86NO13P | PI (36:0)                        | L2 | Lipids: Glycerophospholipids | 1.00 | 1.86 | 1.48 | 1.41 |
|          |   |          |       |             |                                  |    |                              | 1.00 | 0.86 | 0.55 | 0.70 |
